# Supplementary material for: Morphological and Prognostic Values of Skin Lesions in Patients with COVID-19
Source: PubMed Central journal article supplement (PMC11521579; doi:10.1155/2024/4975523), 2024-10-22
Supplement: 4975523.f1.pdf [file 4975523.f1.pdf]

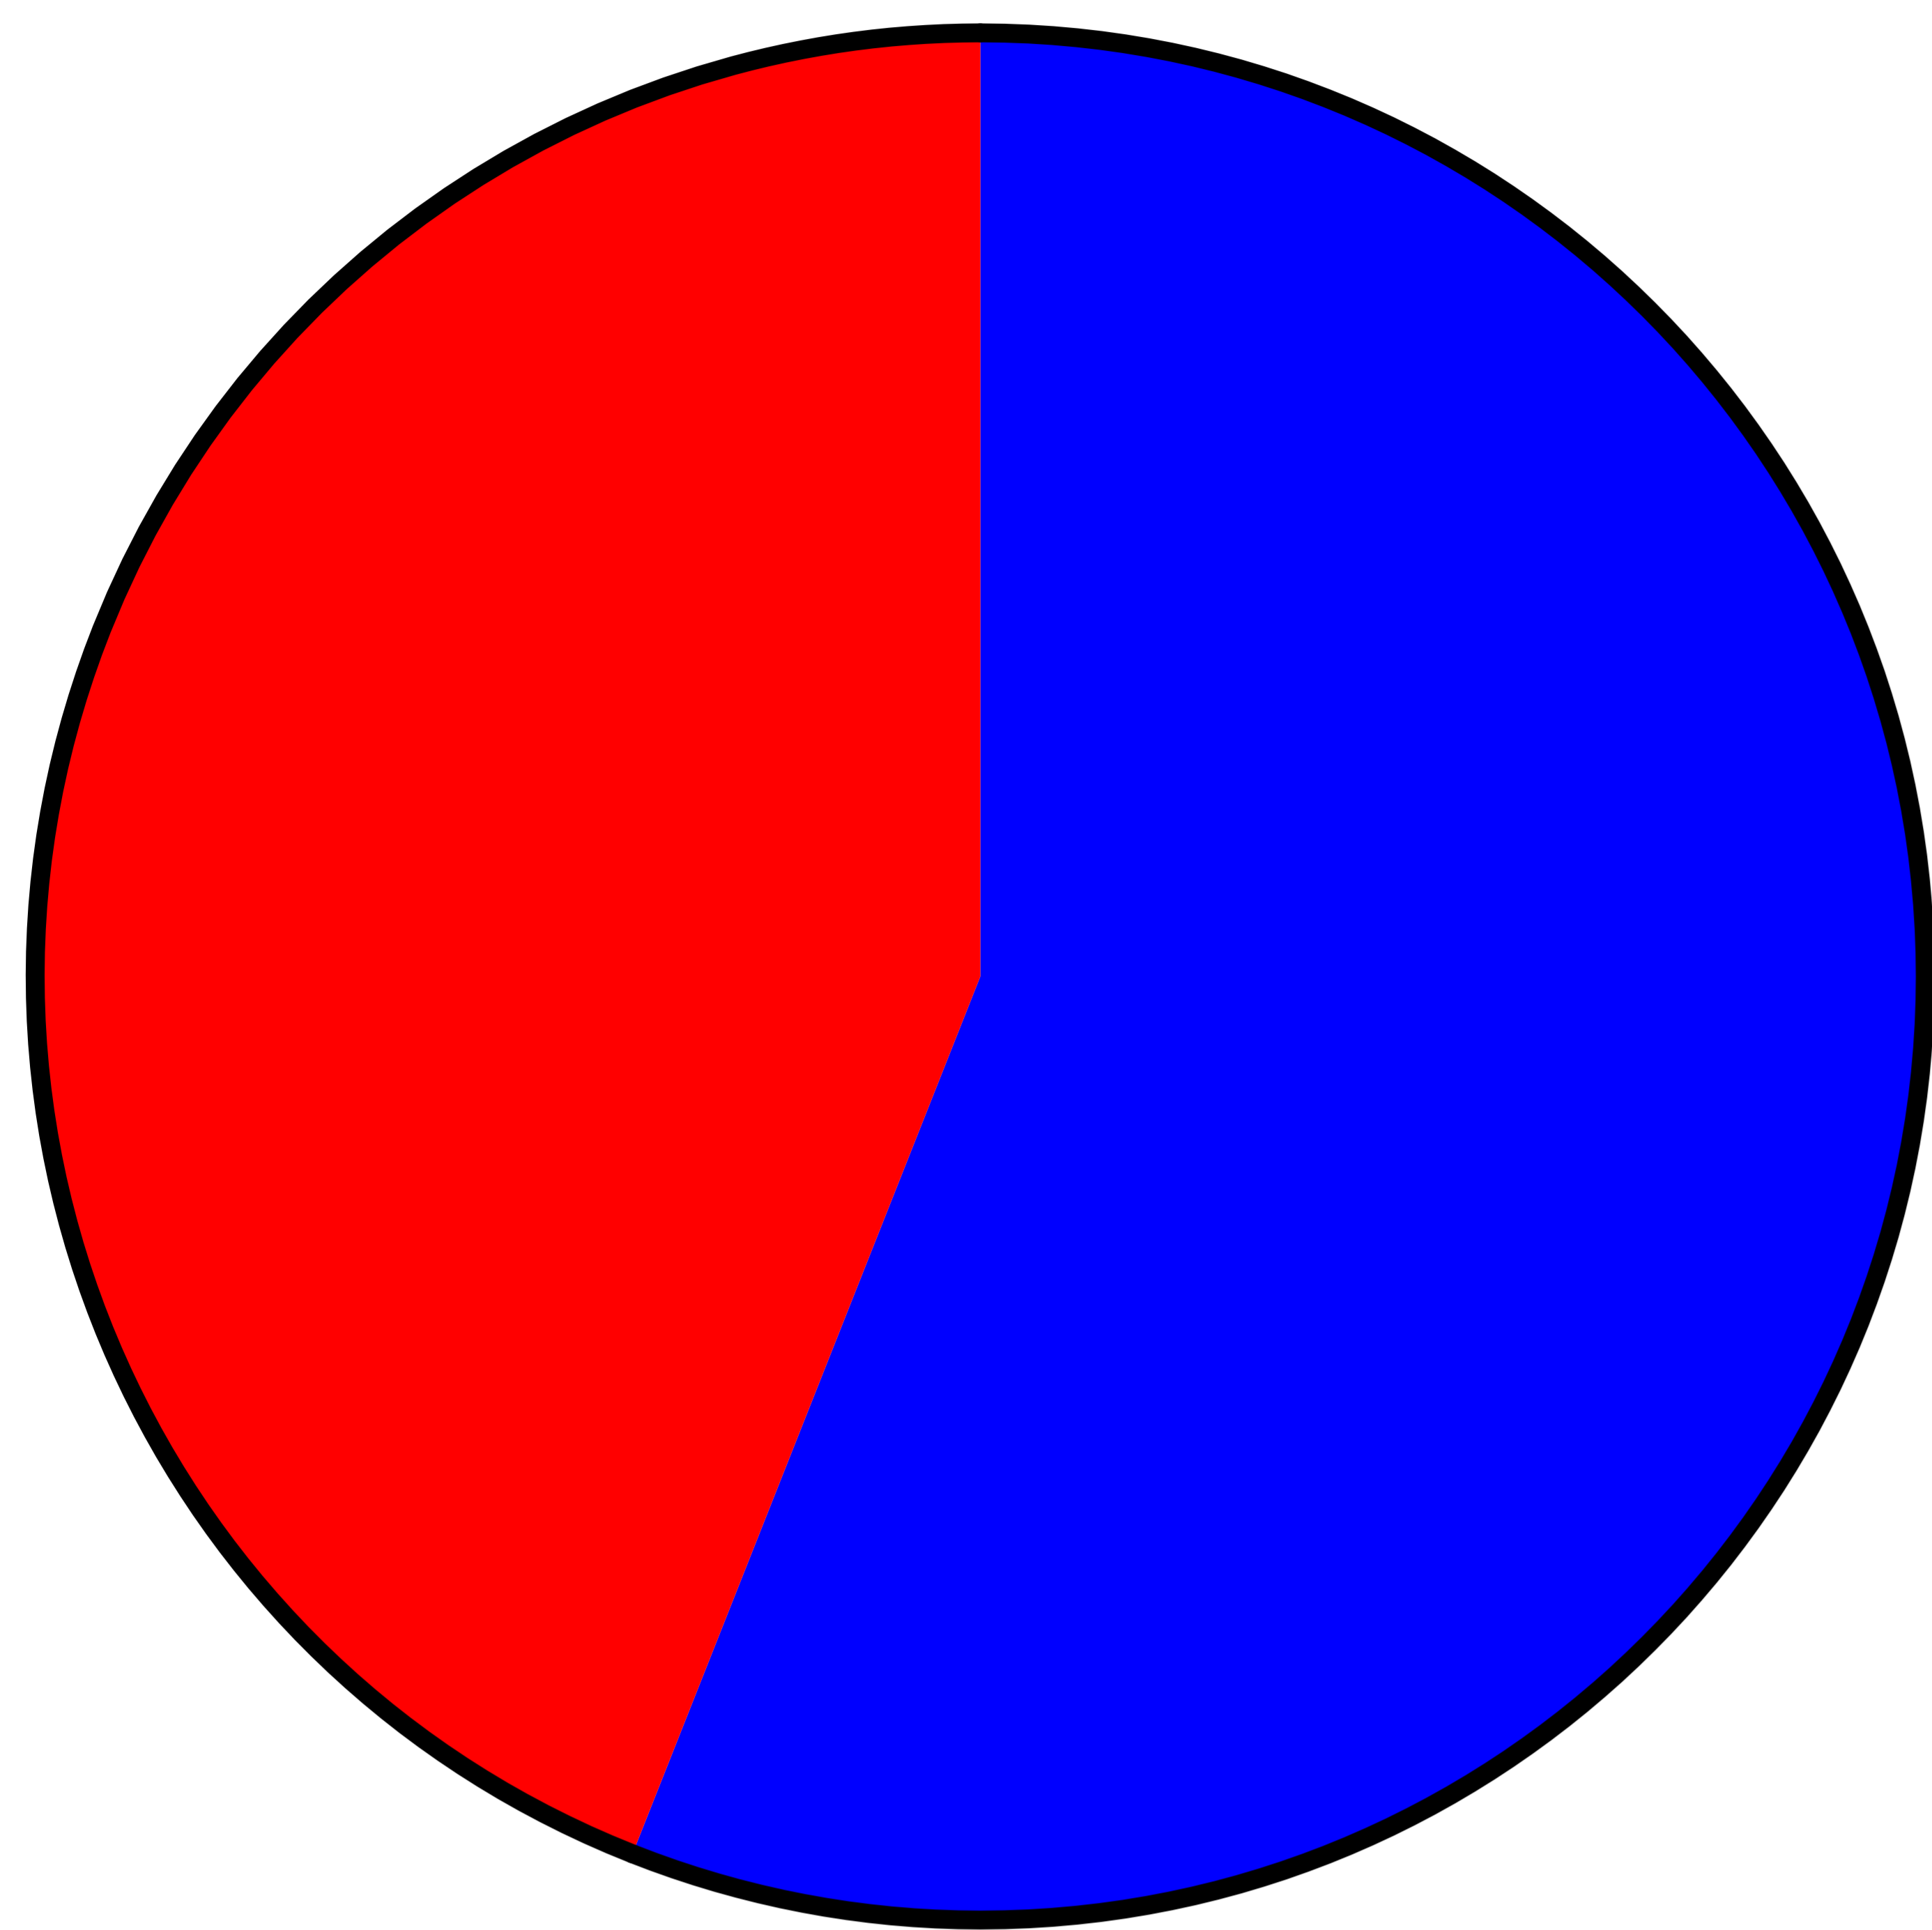

Total= 150

Male  
Female

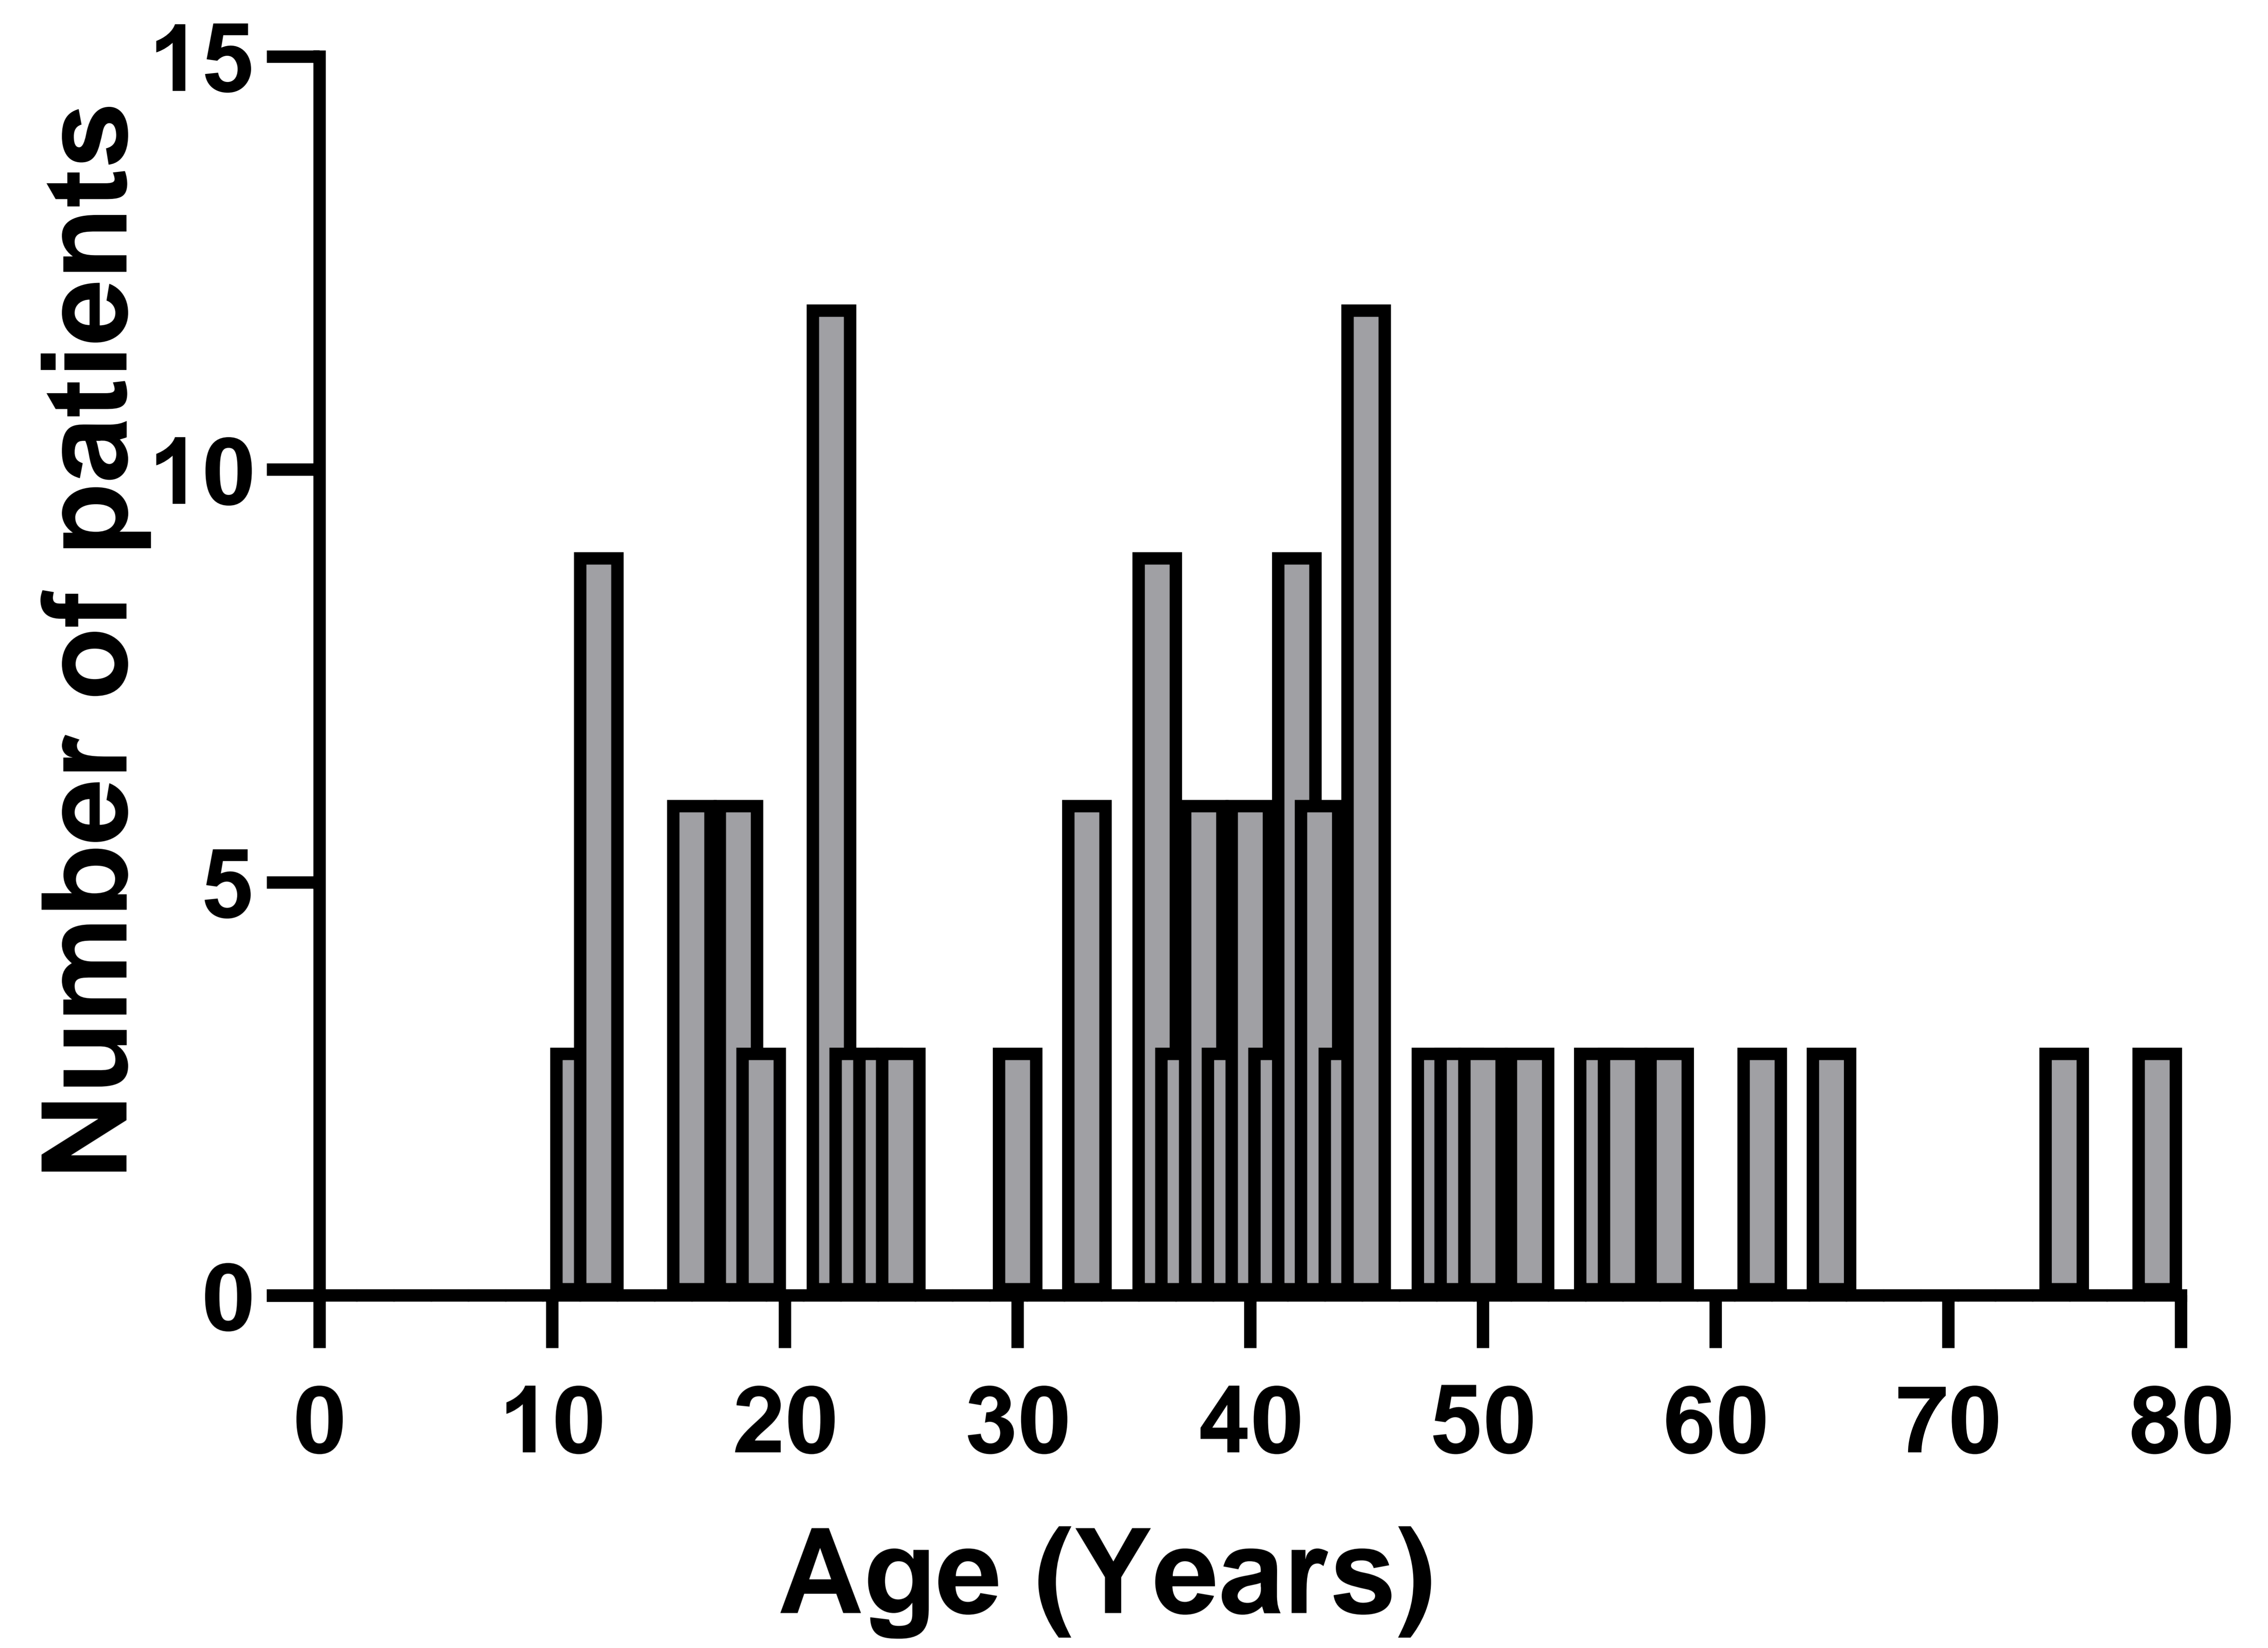

**Supplementary Figure 1:** Graph showing the demographic variables (sex and age) of patients involved in the current study.
